# Supplementary material for: Research on Establishing Corneal Edema after Phacoemulsification Prediction Model Based on Variable Selection with Copula Entropy
Source: MDPI journal article supplement (doi:10.3390/jcm12041290), 2023-02-06
Supplement: s1 [file s1]

**Supplementary Table S1.** Clinical Information of 17 Potential Predictors and the Corneal Edema.

|                              | Mean (min, max)/ Number | Median (IQR) |
|------------------------------|-------------------------|--------------|
| <b>Age (y)</b>               | 70.57(38,91)            | 73(14)       |
| <b>BCVA</b>                  | 0.4549(0.1,1)           | 0.5(0.3)     |
| <b>Pre IOP (mmHg)</b>        | 13.87(7.4,23.4)         | 13.90(3.37)  |
| <b>AL (mm)</b>               | 23.93(21.1,30.56)       | 23.62(1.61)  |
| <b>ACD (mm)</b>              | 3.036(2.25,4.04)        | 3(0.44)      |
| <b>LT (mm)</b>               | 4.621(3.34,5.63)        | 4.65(0.518)  |
| <b>CCT (μm)</b>              | 511.8(429,621)          | 514(44.5)    |
| <b>ECD (/mm<sup>2</sup>)</b> | 2556(1815,3409)         | 2574(486)    |
| <b>CDE (%S)</b>              | 3.701(0,19.74)          | 2.85(3.083)  |
| <b>U/S time (s)</b>          | 23.44(0,93.1)           | 18.55(16.06) |
| <b>TAT (s)</b>               | 151.3(55,284)           | 146.5(53.8)  |
| <b>EFU (cc)</b>              | 47.09(20,95)            | 46(38,55)    |
| <b>Gender</b>                |                         |              |
| Male                         | 77                      | 43.26%       |
| Female                       | 101                     | 56.74%       |
| <b>HBP</b>                   |                         |              |
| Yes                          | 83                      | 46.63%       |
| No                           | 95                      | 53.37%       |
| <b>Dia</b>                   |                         |              |
| Yes                          | 51                      | 28.65%       |
| No                           | 127                     | 71.35%       |
| <b>NH</b>                    |                         |              |
| 2                            | 84                      | 47.19%       |
| 3                            | 86                      | 48.31%       |
| 4                            | 8                       | 4.49%        |
| <b>Fluidics System</b>       |                         |              |
| Active                       | 58                      | 32.58%       |
| Gravity                      | 120                     | 67.42%       |
| <b>Corneal Edema</b>         |                         |              |
| Yes                          | 30                      | 16.85%       |
| No                           | 148                     | 83.15%       |

ACD, anterior chamber depth; AL, axial length; BCVA, best corrected visual acuity; CCT, central corneal thickness; CDE, cumulative dissipated energy; CE, corneal edema; Dia, diabetes; ECD, corneal endothelial cell density; EFU, estimated fluid used; HBP, hypertension; LT, lens thickness; NH, nuclear hardness; Pre IOP, preoperative intraocular pressure; TAT, total aspiration time; U/S time, ultrasound time.
